# Supplementary material for: Response of water vapour D-excess to land-atmosphere interactions in a semi-arid environment
Source: Copernicus journal article supplement (doi:10.5194/hess-2016-271), 2016-06-30
Supplement: Supplementary file [file hess-2016-271-AC2-supplement.pdf]

1 **Anonymous Referee #2**

2 Received and published: 17 August 2016

3 **Summary:**

4 The authors present an analysis of two weeks of atmospheric water vapor stable isotope  
5 measurements in a semi-arid environment. They focus on understanding the potential drivers of D-  
6 excess variability they observed in the near surface atmosphere. They use the short-term Keeling plot  
7 method to calculate the isotopic composition of the ET flux and find that under these conditions, ET  
8 cannot explain the increase in mid-day D-excess which has been observed in many other locations and  
9 studies. They use radon concentration measurements to constrain the influence of entrainment of  
10 moisture with a different isotopic composition from the free troposphere and don't find much support  
11 for an anomalous signal from the free troposphere. In the end, they conclude that the fact that mid-day  
12 D-excess is correlated with local RH, means that an oceanic evaporation signature is unchanged as the  
13 air mass passes over the dry land mass.

14

15 *We thank the reviewer for their comments. Our responses are detailed below in italics.*

16 **Major comments:**

17 This paper is appropriate for HESS, but there are major flaws in the discussion and analysis that need  
18 to be addressed before publication.

19 1. The authors should provide more details of their methods. They should discuss analytical  
20 uncertainty of their measurements, especially the  $d_{ET}$  calculations. Small ET fluxes make  
21 measuring the  $d_{ET}$  values difficult. Were the plexiglass chambers tested for isotopic  
22 effects?

23 *As noted in our response to Reviewer 1, we can include comments about analytical*  
24 *uncertainty into the results and methods sections, in particular, the Keeling plot intercepts*  
25 *and CG for soil evaporation front modelling.*

26 *For the chamber measurement, whether the ET fluxes are small or not is irrelevant for*  
27 *determination of  $d_{ET}$ . Our method for determining  $d_{ET}$  was based on using flux chambers and*  
28 *the Keeling plot method, so the change in  $H_2O$  concentration during a chamber measurement*  
29 *and the difference between the isotope composition of ET fluxes and ambient vapour are the*  
30 *variables that influence  $d_{ET}$  uncertainty. As discussed in the text in lines 234-244, we used a*  
31 *quality control routine to ensure that the assumptions of the Keeling method were met.*

32 2. Throughout the discussion of the results, the authors comment on how their results  
33 contradict previous studies. The results are in fact different, but I believe they represent  
34 very different environmental conditions and the discussion should be prefaced with that in  
35 mind.

36 *In fact our results are not different, as we observe a very similar D-excess diurnal cycle as*  
37 *other studies (e.g. Bastrikov et al., 2014; Simonin et al., 2014; Welp et al., 2012). So in this*  
38 *sense we do not contradict other studies. However, by adding  $d_{ET}$  measurements we are able*  
39 *to provide a more conclusive role for ET fluxes in the D-excess diurnal cycle. While we*  
40 *contradict the conclusions of Simonin et al. (2014) and Zhao et al. (2014) (as noted lines 588-*  
41 *589), they do not provide direct measurements of  $d_{ET}$ . Others have been more circumspect*  
42 *(Bastrikov et al., 2014; Welp et al., 2008). Regardless, our results are very similar, but are*  
43 *able to provide different (or more conclusive) interpretations through directly measuring  $d_{ET}$ .*

44 *As reviewer 2 indicates, it is certainly possible (likely) that we are observing different*  
45 *environmental conditions to the other studies referenced above. We agree with this statement*  
46 *and provided context of our findings in the discussion (4.2) and also mention this in the*  
47 *abstract. We can further modify section 4.2 to make this clearer: in particular in paragraph 2*  
48 *of section 4.2 where we can add more direct reference to the literature for context of our*  
49 *results.*

50 3. The discussion of using  $d_v$  as a tracer of RH of the oceanic moisture source region contains  
51 many errors and is a misrepresentation of Aemisegger et al. The original application is to use  $d_v$  along  
52 with  $d_{18O}$  and  $dD$  to solve for temperature and RH of the oceanic source region, not to assume that  
53 RH near the ocean surface is 100%. Ocean surface humidity is more like 75% on average anyway. A  
54 strong correlation between local  $d_v$  and local RH does not necessarily imply a preserved signature of  
55 the oceanic moisture source region. This would require that local and source RH are tightly coupled.  
56 Or, that changes in local RH are driven by mixing with a constant isotopic source of moisture (e.g. the  
57 free troposphere). The authors do not describe the Aemisegger approach correctly. Their aim was to  
58 estimate terrestrial evapotranspiration based on assumptions about the oceanic moisture source  
59 informed by back-trajectories and climate observations.

60 *Reviewer 2 is indeed correct that the main aims of Aemisegger et al (2014) was to estimate*  
61 *terrestrial evapotranspiration using  $d_v$  as a tracer. However, within their paper they use the precise*  
62 *methodology described in our section 4.1 to estimate the D-excess of the average liquid moisture*  
63 *source. We refer the reviewer to page 14 of section 5.1 and Appendix A in Aemisegger et al (2014).*  
64 *Please also refer to figures 7, 10 and 11 from Aemisegger et al (2014) where the methodology is*  
65 *applied.*

66 *Reviewer 2 appears to have misunderstood the application of our methodology, which was*  
67 *taken from Aemisegger et al (2014). This methodology does not assume the RH near the ocean*  
68 *surface is 100% and it does not model the vapour D-excess of the moisture source. Instead the method*  
69 *uses the closure assumption of Merlivat and Jouzel (1979) and shows that for RH=100% the C-G*  
70 *model reduces to  $R_v = R_l/\alpha$  ( $R_v$ =vapour isotope ratio,  $R_l$ =liquid isotope ratio and  $\alpha$ =equilibrium*  
71 *fractionation factor). By definition  $\alpha$  for equilibrium processes is very close to 1, so that  $R_v=R_l$  for*  
72 *RH=100%. Based on this derivation, Aemisegger et al (2014) use the relationship between RH and  $d_v$*   
73 *and extrapolate to an RH of 100%. This reflects a weighted average of D-excess values for*  
74 *contributing liquid moisture sources.*

75 *As the reviewer points out, this implies tight coupling between local and source RH.*  
76 *Exchange between the ABL and free troposphere could impact upon this relationship. There is no way*  
77 *we can determine if this was the case from our dataset (which we discuss in the same section - lines*  
78 *562-585). However, to produce the strong relationship we see between RH and  $d_v$ , the free*  
79 *troposphere source of moisture must have a relatively constant D-excess, otherwise the relationship*  
80 *would be weakened. Likewise, for multiple moisture sources from the surface, as reviewer 2 surmises,*  
81 *these are likely to significantly weaken the relationship between RH and  $d_v$ . So while we cannot rule*  
82 *out the influence of these effects, we conclude that the  $d_v$  during the day indicates a large remote*  
83 *moisture source: most probably a large reservoir such as the ocean.*

84 *To accommodate the misunderstanding and concerns of reviewer 2, we will provide some*  
85 *additional details of the methodology of Aemisegger et al (2014). In particular, reference to the*  
86 *closure assumption of Merlivat and Jouzel (1979) will be made. We will also make it clearer that we*  
87 *are not aiming to calculate the D-excess of the vapour at the remote moisture source, but the liquid*  
88 *source D-excess. Additionally, in our discussion of the methodology we will include details to address*  
89 *concerns about coupling between local and source RH, with direct reference to multiple sources and*  
90 *not accounting for ABL/free tropospheric exchange.*

91 3. This study is too short to examine synoptic variability with any depth.

92 *We have not examined synoptic variability in depth: we simply refer to synoptic conditions to provide*  
93 *context for our short study. As outlined in addressing reviewer 1's comments (lines 27-43 of that*  
94 *response), given the relatively short duration of the campaign, providing some synoptic context was*  
95 *appropriate. In doing this, we refer to the specific conditions evident during the campaign, but also*  
96 *examine what conclusions may be relevant in a wider context. This is the purpose of section 4.2.*

97

98 **Specific comments:**

99 In 31: citation missing

100 *We prefer to leave references out of the abstract as we feel it infers we are directly evaluating the*  
101 *referenced paper, which we are not. Relevant references are included in the Introduction.*

102 In33-35: there are a fair number of dET measurements published, which you discuss later in fact.

103 *There are a number of studies presenting  $d_v$  measurements, but only Huang et al. (2014) presents*  
104 *actual  $d_{ET}$  measurements, which is referenced in our paper.*

105 In 126-127: Welp et al. measured dET

106 *They measured  $d_v$  (see abstract and methods) and modelled the D-excess of transpiration (see section*  
107 *4.3). As we stated in the text,  $d_{ET}$  measurements were not made.*

108 In 144: lat/lon

109 *Done.*

110 section 2.2.1: Please comment on the non-linearity of the delta values with respect to water vapor  
111 mixing ratio of the LGR analyzer and the stability of the calibration before/after the field experiment.  
112 The Picarro calibration method does not correct for water mixing ratio dependence of the analyzer. At  
113 what water levels were the analyzer uncertainties characterized?

114 *It may be that this section is not clear, as we explicitly corrected for water vapour cross-sensitives for*  
115 *both analysers, since this is one of the major contributors to measurement uncertainty. We have*  
116 *mentioned this on line 165 and line 175, but can attempt to make this even clearer in the text.*

117 In 191: how long was the tubing and what was the flow rate in them?

118 *We have added this information – “Approximately 20m of tubing was required to connect the tower*  
119 *inlet to the analyser. A vacuum pump (MV 2 NT, Vacuubrand, Wertheim, Germany) was used to draw*  
120 *air through all inlets to the analyser at a flow rate of 10 l.min<sup>-1</sup>.”*

121 In 289: what modifications were made to West et al.?

122 *Our modifications were minimal, simply using our own vacuum line. We will remove ‘similar’ from*  
123 *the text.*

124 In 374: significant periods of the day were excluded to characterize a diurnal cycle.

125 *We agree that ‘diurnal cycle’ is misleading, so will change the wording to indicate that we refer to the*  
126 *transition between the stable nocturnal and convective boundary layers.*

127 In 377-381: Is there any evidence that this much difference between soil water and the evaporation  
128 front could be real?

129 *We believe this difference is entirely possible and not at all surprising. Dubbert et al. (2013) observed*  
130 *a large enrichment in soil moisture  $\delta^{18}\text{O}$  values near the surface in their soil profile measurements, as*  
131 *did the seminal work of Allison et al. (1983). Besides literature evidence, our 0-5 cm soil*  
132 *measurements showed low D-excess compared to the LMWL indicating evaporative enrichment. It*  
133 *can be presumed that moisture at the evaporation front would be much more enriched and D-excess*  
134 *much lower. We will add further reference to the literature to support our measurements and expand*  
135 *on the reasons for confidence in the modelled soil isotope values.*

136 In 401-406: Are you referring to Fig 7 here? It's very difficult to see these features in the data as it is  
137 plotted.

138 *Yes, we are referring to figure 7, as indicated at the start of this paragraph. We believe the drier*  
139 *mixing ratios observed from May 5th are quite clear in the plot. However, we can attempt to make*  
140 *this clearer to the reader.*

141 In 458-460: I'm not sure about this. I think you have to make a stronger case that it's not entrainment  
142 of air from above the boundary layer.

143 *Indeed. We discuss this precise issue later (lines 562 to 585) and the fact that we cannot rule out*  
144 *entrainment as a possible explanatory mechanism.*

145 In 485: typo? 'encroachment'

146 *Encroachment mixing is common terminology used in boundary layer meteorology, referring to the*  
147 *process where the mixed layer encroaches upwards as the layer warms.*

148 In 537-546: This paragraph has major problems. See #3 above. The authors come to some  
149 unsupported conclusions here based on a misunderstanding of many of the processes controlling  
150 vapor isotopes.

151 *We disagree that there are any unsupported conclusions in the text and refer the reviewer to the*  
152 *comments above (lines 59-89).*

153 In 566-569: under what conditions was this observed?

154 *We will make this more clear by referring the reader to the correct figure (Figure 8) - **Error!***  
155 ***Reference source not found.** shows that following the morning transition, a drying trend observed*  
156 *during the day, indicating entrainment fluxes were larger than ET fluxes, which has been previously*  
157 *shown using large-eddy simulations (Huang et al. 2011) and observations (Davis et al. 1997)."*

158 In 608-609: the two processes have very different fractionation factors as well

159 *We have modified this passage to include the difference in fractionation factors – “Relative*  
160 *magnitudes of evaporation and transpiration fluxes are important for  $d_{ET}$ . The two processes draw on*  
161 *moisture from different depths within the soil column and have very different fractionation factors, so*  
162 *fluxes are likely to have different D-excess values.*

163 In 632: Didn't you screen out nighttime dET measurements? Consider showing a plot of dET time  
164 series.

165 *Yes this is true. We will change the terminology to indicate more explicitly that we are referring to*  
166 *transitional periods between the stable and nocturnal boundary layers.*

167 Fig 6: This figure needs more discussion.

168 *We have discussed this figure across three separate paragraphs in section 3.2. If the reviewer could*  
169 *be more specific about their concerns we would be happy to address them.*

170 **References**

- 171 Aemisegger, F., Pfahl, S., Sodemann, H., Lehner, I., Seneviratne, S. I., & Wernli, H. (2014).  
172 Deuterium excess as a proxy for continental moisture recycling and plant transpiration.  
173 *Atmospheric Chemistry and Physics*, 14(8), 4029–4054. doi:10.5194/acp-14-4029-2014
- 174 Allison, G. B., Barnes, C. J., & Hughes, M. W. (1983). The distribution of deuterium and  $^{18}\text{O}$  in dry  
175 soils 2. Experimental. *Journal of Hydrology*, 64(1-4), 377–397. doi:10.1016/0022-  
176 1694(83)90078-1
- 177 Bastrikov, V., Steen-Larsen, H. C., Masson-Delmotte, V., Griбанov, K., Cattani, O., Jouzel, J., &  
178 Zakharov, V. (2014). Continuous measurements of atmospheric water vapour isotopes in  
179 western Siberia (Kourovka). *Atmospheric Measurement Techniques*, 7(6), 1763–1776.  
180 doi:10.5194/amt-7-1763-2014
- 181 Davis, K. J., Lenschow, D. H., Oncley, S. P., Kiemle, C., Ehret, G., Giez, A., & Mann, J. (1997). Role  
182 of entrainment in surface-atmosphere interactions over the boreal forest. *Journal of Geophysical*  
183 *Research: Atmospheres*, 102(D24), 29219–29230. doi:10.1029/97JD02236
- 184 Dubbert, M., Cuntz, M., Piayda, A., Maguás, C., & Werner, C. (2013). Partitioning evapotranspiration  
185 – Testing the Craig and Gordon model with field measurements of oxygen isotope ratios of  
186 evaporative fluxes. *Journal of Hydrology*, 496, 142–153. doi:10.1016/j.jhydrol.2013.05.033
- 187 Huang, J., Lee, X., & Patton, E. G. (2011). Entrainment and budgets of heat, water vapor, and carbon  
188 dioxide in a convective boundary layer driven by time-varying forcing. *Journal of Geophysical*  
189 *Research: Atmospheres*, 116(D6), D06308. doi:10.1029/2010JD014938
- 190 Huang, L., & Wen, X. (2014). Temporal variations of atmospheric water vapor  $\delta\text{D}$  and  $\delta^{18}\text{O}$  above  
191 an arid artificial oasis cropland in the Heihe River Basin. *Journal of Geophysical Research:*  
192 *Atmospheres*, 119(19), 2014JD021891. doi:10.1002/2014JD021891
- 193 Merlivat, L., & Jouzel, J. (1979). Global climatic interpretation of the deuterium-oxygen 18  
194 relationship for precipitation. *Journal of Geophysical Research: Oceans*, 84(C8), 5029–5033.  
195 doi:10.1029/JC084iC08p05029
- 196 Simonin, K. A., Link, P., Rempe, D., Miller, S., Oshun, J., Bode, C., ... Dawson, T. E. (2014).  
197 Vegetation induced changes in the stable isotope composition of near surface humidity.  
198 *Ecohydrology*, 7(3), 936–949. doi:10.1002/eco.1420
- 199 Welp, L. R., Lee, X., Griffis, T. J., Wen, X.-F., Xiao, W., Li, S., ... Huang, J. (2012). A meta-analysis  
200 of water vapor deuterium-excess in the midlatitude atmospheric surface layer. *Global*  
201 *Biogeochemical Cycles*, 26(3), GB3021. doi:10.1029/2011GB004246
- 202 Welp, L. R., Lee, X., Kim, K., Griffis, T. J., Billmark, K. A., & Baker, J. M. (2008).  $\delta^{18}\text{O}$  of water  
203 vapour, evapotranspiration and the sites of leaf water evaporation in a soybean canopy. *Plant,*  
204 *Cell & Environment*, 31(9), 1214–1228. doi:10.1111/j.1365-3040.2008.01826.x
- 205 Zhao, L., Wang, L., Liu, X., Xiao, H., Ruan, Y., & Zhou, M. (2014). The patterns and implications of  
206 diurnal variations in the d-excess of plant water, shallow soil water and air moisture. *Hydrology*  
207 *and Earth System Sciences*, 118(10), 4129–4151. doi:10.5194/hess-18-4129-2014

208
